# Supplementary material for: Effect of Different Piperacillin-Tazobactam Dosage Regimens on Synergy of the Combination with Tobramycin against Pseudomonas aeruginosa for the Pharmacokinetics of Critically Ill Patients in a Dynamic Infection Model
Source: MDPI journal article supplement (doi:10.3390/antibiotics11010101), 2022-01-13
Supplement: s1 [file s1]

## Article

# Effect of Different Piperacillin-Tazobactam Dosage Regimens on Synergy of the Combination with Tobramycin against *Pseudomonas aeruginosa* for the Pharmacokinetics of Critically Ill Patients in a Dynamic Infection Model

Jessica R. Tait <sup>1</sup>, Hajira Bilal <sup>2</sup>, Kate E. Rogers <sup>1</sup>, Yinzhi Lang <sup>3</sup>, Tae Hwan Kim <sup>4</sup>, Jieqiang Zhou <sup>3</sup>, Steven C. Wallis <sup>5</sup>, Jürgen B. Bulitta <sup>3</sup>, Carl M. J. Kirkpatrick <sup>2</sup>, David L. Paterson <sup>5</sup>, Jeffrey Lipman <sup>5,6,7,8</sup>, Phillip J. Bergen <sup>2</sup>, Jason A. Roberts <sup>5,6,7</sup>, Roger L. Nation <sup>1</sup> and Cornelia B. Landersdorfer <sup>1,\*</sup>

<sup>1</sup> Drug Delivery, Disposition and Dynamics, Monash Institute of Pharmaceutical Sciences, Monash University, Parkville, VIC 3052, Australia; Jessica.Tait@monash.edu (J.R.T.); Kate.Rogers@monash.edu (K.E.R.); Roger.Nation@monash.edu (R.L.N.)

<sup>2</sup> Centre for Medicine Use and Safety, Monash Institute of Pharmaceutical Sciences, Monash University, Parkville, VIC 3052, Australia; hajira.bilal1@monash.edu (H.B.); carl.kirkpatrick@monash.edu (C.M.J.K.); phillip.bergen@monash.edu (P.J.B.)

<sup>3</sup> Department of Pharmacotherapy and Translational Research, College of Pharmacy, University of Florida, Orlando, FL 32827, USA; y.lang@cop.ufl.edu (Y.L.); zhou.jieqiang@cop.ufl.edu (J.Z.); JBulitta@cop.ufl.edu (J.B.B.)

<sup>4</sup> College of Pharmacy, Daegu Catholic University, Gyeongsan 38430, Korea; taehwan.sch@gmail.com

<sup>5</sup> The University of Queensland Center for Clinical Research, The University of Queensland, Brisbane, QLD 4029, Australia; s.wallis@uq.edu.au (S.C.W.); david.antibiotics@gmail.com (D.L.P.); j.lipman@uq.edu.au (J.L.); j.roberts2@uq.edu.au (J.A.R.)

<sup>6</sup> Intensive Care Unit, Royal Brisbane and Women's Hospital, Brisbane, QLD 4029, Australia

<sup>7</sup> Division of Anaesthesiology Critical Care Emergency and Pain Medicine, Nîmes University Hospital, University of Montpellier, 30900 Nîmes, France

<sup>8</sup> Jamieson Trauma Institute, Royal Brisbane and Women's Hospital, Brisbane, QLD 4029, Australia

\* Correspondence: Cornelia.Landersdorfer@monash.edu; Tel.: +61-3-990-39011

## Supplementary materials

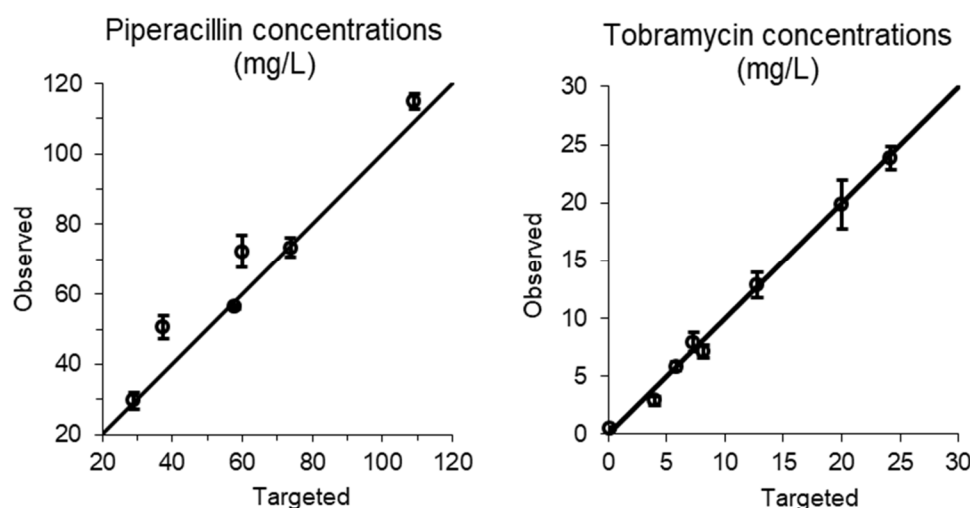

**Figure S1.** Observed (average $\pm$ SE) versus targeted piperacillin and tobramycin concentrations in the dynamic in vitro infection model studies.

<sup>a</sup> For piperacillin targeted concentrations of 29.1, 37.5, 58, 59.9, 73.8 and 109 mg/L, the number of datapoints measured were 8, 17, 40, 6, 16, and 40, respectively. For tobramycin targeted concentrations of 0.159, 4.00, 5.81, 7.32, 8.15, 12.8, 20.0, and 24.2 mg/L, the number of datapoints measured were 3, 3, 5, 5, 7, 8, 7, and 32, respectively.

**Table S1.** Log change for each treatment as a function of time from static-concentration time-kill studies. Treatments were either piperacillin (Pip)-tazobactam, tobramycin (Tob), or a combination, at the concentrations indicated. Blue shading indicates enhanced activity<sup>a</sup> and green shading indicates synergy<sup>b</sup>.

| Log change [log <sub>10</sub> (CFU <sub>t</sub> ) - log <sub>10</sub> (CFU <sub>0</sub> )] |                                             |          |             |             |             |            |            |            |                     |                     |                     |                     |                     |                     |                     |                     |                     |  |
|--------------------------------------------------------------------------------------------|---------------------------------------------|----------|-------------|-------------|-------------|------------|------------|------------|---------------------|---------------------|---------------------|---------------------|---------------------|---------------------|---------------------|---------------------|---------------------|--|
| Isolate                                                                                    | Initial inoculum (log <sub>10</sub> CFU/mL) | Time (h) | Pip 12 mg/L | Pip 24 mg/L | Pip 75 mg/L | Tob 1 mg/L | Tob 2 mg/L | Tob 8 mg/L | Pip 12 + Tob 1 mg/L | Pip 24 + Tob 1 mg/L | Pip 75 + Tob 1 mg/L | Pip 12 + Tob 2 mg/L | Pip 24 + Tob 2 mg/L | Pip 75 + Tob 2 mg/L | Pip 12 + Tob 8 mg/L | Pip 24 + Tob 8 mg/L | Pip 75 + Tob 8 mg/L |  |
| CR382                                                                                      | 5.99                                        | 1.5      | -0.91       | -0.82       | -0.81       | -2.24      | -2.76      | -4.09      | -2.41               | -2.56               | -2.30               | -2.71               | -2.24               | -2.85               | -4.21               | -3.44               | -3.79               |  |
|                                                                                            |                                             | 3        | -0.52       | -1.21       | -1.09       | -3.00      | -3.76      | -4.69      | -3.04               | -3.31               | -2.82               | -3.76               | -3.61               | -3.37               | -4.99               | -4.99               | -5.99               |  |
|                                                                                            |                                             | 6        | -0.20       | -0.94       | -1.24       | -2.82      | -3.79      | -5.99      | -3.12               | -3.49               | -3.13               | -4.29               | -3.99               | -4.04               | -5.99               | -5.99               | -5.99               |  |
|                                                                                            |                                             | 24       | 2.10        | 1.39        | -1.67       | 2.10       | -3.12      | -4.39      | -2.46               | -2.82               | -2.63               | -3.37               | -2.47               | -2.92               | -4.21               | -3.99               | -3.85               |  |
|                                                                                            |                                             | 29       | 2.19        | 1.48        | -1.56       | 2.68       | -2.04      | -4.69      | -3.79               | -3.23               | -3.59               | -4.99               | -4.15               | -4.69               | -4.99               | -5.99               | -4.99               |  |
|                                                                                            |                                             | 48       | 2.09        | 1.47        | -1.36       | 3.39       | 3.31       | -4.99      | -2.67               | -1.98               | -3.18               | -4.69               | -2.52               | -4.39               | -5.99               | -5.99               | -5.99               |  |
|                                                                                            |                                             | 72       | 1.70        | 1.24        | -1.24       | 3.03       | 3.55       | -5.99      | -2.68               | -2.58               | -3.35               | -5.99               | -5.99               | -5.99               | -5.99               | -4.99               | -5.99               |  |
| CR382                                                                                      | 7.38                                        | 1.5      | -0.05       | -0.07       | -0.05       | -0.25      | -0.49      | -2.60      | -0.61               | -0.60               | -0.71               | -1.01               | -0.98               | -1.10               | -2.80               | -2.71               | -2.71               |  |
|                                                                                            |                                             | 3        | 0.54        | 0.38        | 0.34        | 0.38       | -0.63      | -3.79      | -0.73               | -1.47               | -1.60               | -1.76               | -2.20               | -2.56               | -4.26               | -3.87               | -3.81               |  |
|                                                                                            |                                             | 6        | 0.69        | 0.49        | 0.29        | 0.80       | -0.40      | -4.25      | -1.80               | -2.59               | -2.76               | -2.47               | -2.98               | -3.06               | -4.70               | -4.28               | -4.19               |  |
|                                                                                            |                                             | 24       | 1.31        | 1.47        | 1.43        | 1.50       | 1.56       | -1.72      | 1.29                | 0.71                | -2.35               | 0.88                | -0.36               | -2.59               | -3.78               | -3.40               | -3.17               |  |
|                                                                                            |                                             | 29       | 1.28        | 1.68        | 1.51        | 1.49       | 1.05       | -0.65      | 0.88                | 0.63                | -1.86               | 0.70                | -0.28               | -3.34               | -5.26               | -5.38               | -5.20               |  |
|                                                                                            |                                             | 48       | 0.84        | 0.83        | 0.80        | 1.60       | 1.14       | 1.43       | 0.82                | 1.11                | -1.58               | 0.35                | -0.59               | -1.52               | -4.06               | -3.82               | -3.63               |  |
|                                                                                            |                                             | 72       | 1.18        | 0.79        | 0.89        | 0.43       | 1.32       | 0.69       | 0.05                | 0.96                | -1.36               | 1.02                | -0.44               | -1.43               | -4.95               | -4.29               | -4.93               |  |
| CR379                                                                                      | 5.87                                        | 1.5      | -0.49       | -0.38       | -0.55       | -2.10      | -2.06      | -3.32      | -2.22               | -2.08               | -2.36               | -2.90               | -2.28               | -3.19               | -3.39               | -3.97               | -3.72               |  |
|                                                                                            |                                             | 3        | 0.69        | 0.20        | -0.38       | -3.05      | -4.17      | -4.57      | -3.51               | -3.45               | -4.09               | -4.87               | -4.87               | -4.39               | -5.87               | -4.87               | -5.87               |  |
|                                                                                            |                                             | 6        | 1.07        | -0.23       | -2.19       | -3.75      | -4.57      | -5.87      | -3.97               | -4.17               | -4.39               | -5.87               | -5.87               | -5.87               | -5.87               | -5.87               | -5.87               |  |

|       |      |     |       |       |       |       |       |                                 |                                 |                                 |                                 |                                 |                                 |                                 |                                 |                              |       |
|-------|------|-----|-------|-------|-------|-------|-------|---------------------------------|---------------------------------|---------------------------------|---------------------------------|---------------------------------|---------------------------------|---------------------------------|---------------------------------|------------------------------|-------|
| CR379 | 7.57 | 24  | 1.17  | 1.14  | -2.02 | 2.34  | -4.27 | -5.87                           | -2.94                           | -3.27                           | -4.27                           | -4.57                           | -5.87                           | -4.17                           | -5.87                           | -5.87                        | -5.87 |
|       |      | 29  | 1.66  | 1.12  | -1.06 | 3.05  | -3.79 | -5.87                           | -3.39                           | -3.25                           | -3.69                           | -3.91                           | -5.87                           | -3.57                           | -5.87                           | -5.87                        | -5.87 |
|       |      | 48  | 1.42  | 0.72  | -0.74 | 3.14  | 3.01  | -4.87                           | -1.19                           | -2.29                           | -3.64                           | -5.87                           | -5.87                           | -4.87                           | -5.87                           | -5.87                        | -5.87 |
|       |      | 72  | 1.80  | 1.18  | -0.28 | 3.22  | 3.24  | -5.87                           | -0.19                           | -1.08                           | -3.42                           | -4.87                           | -5.87                           | -5.87                           | -5.87                           | -5.87                        | -5.87 |
|       | 7.57 | 1.5 | -0.14 | -0.27 | -0.23 | -0.52 | -1.45 | -3.60                           | -0.82                           | -0.70                           | -0.88                           | -1.79                           | -1.71                           | -1.77                           | -3.37                           | -3.48                        | -3.46 |
|       |      | 3   | 0.39  | 0.16  | 0.07  | -0.62 | -3.01 | -4.91                           | -1.49                           | -1.90                           | -2.27                           | -3.91                           | -3.45                           | -3.70                           | -4.51                           | -4.90                        | -5.14 |
|       |      | 6   | 0.61  | 0.38  | 0.15  | 0.17  | -2.65 | -4.82                           | -1.87                           | -3.00                           | -3.17                           | -3.50                           | -3.38                           | -3.57                           | -4.96                           | -4.89                        | -5.04 |
|       |      | 24  | 0.19  | -0.34 | -0.82 | 1.26  | 1.05  | -2.90                           | -0.01                           | -1.82                           | -2.45                           | -2.51                           | -2.60                           | -2.48                           | -3.23                           | -2.93                        | -3.05 |
|       |      | 29  | 0.19  | -0.79 | -1.57 | 1.15  | 1.30  | -5.14                           | 0.16                            | -1.65                           | -2.66                           | -2.69                           | -2.75                           | -2.72                           | -5.67                           | -5.57                        | -5.97 |
|       |      | 48  | -0.15 | -0.23 | -0.95 | 1.18  | 1.34  | -2.19                           | -0.37                           | -0.08                           | -2.44                           | -1.17                           | -1.69                           | -2.39                           | -4.30                           | -4.79                        | -5.05 |
|       |      | 72  | 0.05  | -0.63 | -1.43 | 0.73  | 0.85  | 1.19                            | 0.22                            | -0.05                           | -2.62                           | 0.77                            | -1.63                           | -2.88                           | -7.57                           | -5.97                        | -5.39 |
|       |      |     |       |       |       |       |       | Pip<br>12 +<br>Tob<br>1<br>mg/L | Pip<br>24 +<br>Tob<br>1<br>mg/L | Pip<br>75 +<br>Tob<br>1<br>mg/L | Pip<br>12 +<br>Tob<br>2<br>mg/L | Pip<br>24 +<br>Tob<br>2<br>mg/L | Pip<br>75 +<br>Tob<br>2<br>mg/L | Pip<br>12 +<br>Tob<br>8<br>mg/L | Pip<br>24 +<br>Tob<br>8<br>mg/L | Pip 75<br>+ Tob<br>8<br>mg/L |       |
| CR380 | 5.80 | 1.5 | -0.34 | -0.46 | -1.09 | -1.70 | -2.53 | -4.20                           | -2.03                           | -2.08                           | -2.22                           | -2.74                           | -3.09                           | -3.07                           | -3.76                           | -3.90                        | -4.02 |
|       |      | 3   | 0.26  | 0.01  | -1.10 | -2.53 | -3.63 | -5.80                           | -3.34                           | -2.96                           | -3.35                           | -3.35                           | -4.20                           | -4.32                           | -4.80                           | -4.80                        | -4.80 |
|       |      | 6   | 1.93  | 0.83  | -1.35 | -3.23 | -3.96 | -5.80                           | -3.17                           | -3.18                           | -3.50                           | -3.85                           | -5.80                           | -5.80                           | -4.80                           | -5.80                        | -5.80 |
|       |      | 24  | 1.80  | 1.31  | -0.81 | 2.81  | -1.03 | -5.80                           | -0.84                           | -2.50                           | -2.85                           | -2.66                           | -3.48                           | -3.76                           | -4.80                           | -5.80                        | -5.80 |
|       |      | 29  | 1.81  | 1.06  | -0.78 | 3.31  | 0.13  | -5.80                           | -0.56                           | -3.96                           | -4.50                           | -4.50                           | -5.80                           | -5.80                           | -5.80                           | -5.80                        | -5.80 |
|       |      | 48  | 1.60  | 1.18  | -0.22 | 3.60  | 3.28  | -5.80                           | 2.29                            | -2.81                           | -3.11                           | -3.26                           | -4.20                           | -5.80                           | -5.80                           | -5.80                        | -5.80 |
|       |      | 72  | 1.56  | 1.44  | 0.14  | 2.60  | 2.61  | -5.80                           | 2.18                            | -2.96                           | -3.04                           | -3.39                           | -3.96                           | -5.80                           | -5.80                           | -5.80                        | -5.80 |
| CR380 | 7.28 | 1.5 | 0.10  | -0.15 | -0.27 | -1.05 | -1.69 | -3.04                           | -1.39                           | -1.34                           | -1.57                           | -2.06                           | -2.04                           | -2.08                           | -2.98                           | -3.15                        | -2.98 |
|       |      | 3   | 0.25  | -0.07 | -0.17 | -0.76 | -1.96 | -4.15                           | -1.41                           | -1.34                           | -2.06                           | -2.54                           | -2.99                           | -3.13                           | -3.54                           | -3.96                        | -3.87 |
|       |      | 6   | 0.58  | 0.31  | -0.65 | 0.49  | -1.96 | -4.44                           | -1.10                           | -1.50                           | -2.59                           | -2.76                           | -3.26                           | -3.58                           | -4.08                           | -4.19                        | -4.10 |

|        |      |            |       |       |       |       |       |       |       |       |       |       |       |       |       |       |       |
|--------|------|------------|-------|-------|-------|-------|-------|-------|-------|-------|-------|-------|-------|-------|-------|-------|-------|
| Pa1281 |      | <b>24</b>  | 0.11  | -0.84 | -1.81 | 1.02  | 1.73  | -3.44 | 0.47  | -0.96 | -2.26 | -0.56 | -2.84 | -3.07 | -3.29 | -3.57 | -3.68 |
|        |      | <b>29</b>  | 0.54  | 0.11  | -1.39 | 1.79  | 1.77  | -2.63 | 0.18  | -0.92 | -3.28 | -0.18 | -4.00 | -4.27 | -5.58 | -5.38 | -5.68 |
|        |      | <b>48</b>  | -0.25 | -0.82 | -1.15 | 1.72  | 1.65  | 1.78  | 0.16  | -0.54 | -3.04 | 0.72  | -3.09 | -3.50 | -5.58 | -4.90 | -4.98 |
|        |      | <b>72</b>  | -0.21 | -0.67 | -1.28 | 1.51  | 1.89  | 1.84  | 0.26  | 0.32  | -2.25 | 0.50  | -1.58 | -2.96 | -4.59 | -5.28 | -5.08 |
|        | 6.16 | <b>1.5</b> | -0.11 | -0.11 | -0.20 | -3.12 | -3.75 | -4.86 | -3.41 | -3.21 | -3.80 | -3.91 | -4.02 | -3.78 | -5.16 | -6.16 | -5.16 |
|        |      | <b>3</b>   | -1.66 | -1.58 | -1.76 | -3.69 | -4.86 | -6.16 | -3.96 | -4.56 | -4.56 | -5.16 | -5.16 | -5.16 | -6.16 | -6.16 | -6.16 |
|        |      | <b>6</b>   | -2.69 | -2.78 | -3.56 | -4.86 | -6.16 | -6.16 | -6.16 | -6.16 | -6.16 | -6.16 | -6.16 | -6.16 | -6.16 | -6.16 | -6.16 |
|        |      | <b>24</b>  | 1.16  | -0.64 | -3.15 | -2.02 | -6.16 | -6.16 | -6.16 | -5.16 | -6.16 | -6.16 | -6.16 | -6.16 | -6.16 | -6.16 | -6.16 |
|        |      | <b>29</b>  | 2.05  | 1.25  | -3.55 | -0.61 | -6.16 | -6.16 | -6.16 | -6.16 | -6.16 | -6.16 | -6.16 | -6.16 | -6.16 | -6.16 | -6.16 |
|        |      | <b>48</b>  | 2.55  | 2.05  | -2.30 | 2.85  | -0.54 | -6.16 | -6.16 | -6.16 | -6.16 | -6.16 | -6.16 | -6.16 | -6.16 | -6.16 | -6.16 |
|        |      | <b>72</b>  | 2.81  | 2.65  | 0.25  | 3.06  | 2.20  | -6.16 | -6.16 | -6.16 | -6.16 | -6.16 | -6.16 | -6.16 | -6.16 | -6.16 | -6.16 |
| Pa1281 | 7.46 | <b>1.5</b> | 0.26  | 0.09  | -0.14 | -1.62 | -3.47 | -4.71 | -2.80 | -1.66 | -2.91 | -3.44 | -3.67 | -3.88 | -5.76 | -6.46 | -7.46 |
|        |      | <b>3</b>   | 0.27  | 0.26  | 0.22  | -3.19 | -3.89 | -5.68 | -4.08 | -3.86 | -3.93 | -4.48 | -4.71 | -5.21 | -7.46 | -7.46 | -7.46 |
|        |      | <b>6</b>   | 0.11  | 0.06  | -0.12 | -3.74 | -4.89 | -6.46 | -4.53 | -4.45 | -4.64 | -5.32 | -5.56 | -6.16 | -7.46 | -7.46 | -7.46 |
|        |      | <b>24</b>  | -0.85 | -0.67 | -0.75 | 0.99  | -1.11 | -7.46 | -1.86 | -3.62 | -3.62 | -5.35 | -5.38 | -5.16 | -7.46 | -7.46 | -7.46 |
|        |      | <b>29</b>  | -0.52 | -0.46 | -0.83 | 1.45  | 0.36  | -7.46 | -3.85 | -7.46 | -7.46 | -7.46 | -7.46 | -7.46 | -7.46 | -7.46 | -7.46 |
|        |      | <b>48</b>  | -0.14 | -0.19 | -0.49 | 1.60  | 1.36  | -7.46 | -0.23 | -7.46 | -7.46 | -7.46 | -7.46 | -7.46 | -7.46 | -7.46 | -7.46 |
|        |      | <b>72</b>  | 0.42  | 0.41  | -0.37 | 1.71  | 1.60  | -4.15 | 1.03  | -7.46 | -7.46 | -7.46 | -7.46 | -7.46 | -7.46 | -7.46 | -7.46 |

Log change was calculated as change in  $\log_{10}$  CFU/mL from 0 h ( $\text{CFU}_0$ ) to time t ( $\text{CFU}_t$ ), where  $\log \text{ change} = \log_{10} (\text{CFU}_t) - \log_{10} (\text{CFU}_0)$ . <sup>a</sup>enhanced activity was defined as a 1 to  $<2 \log_{10}$  superior killing for the combination compared to its most active component at the specified time and  $\geq 2 \log_{10}$  below the initial inoculum; <sup>b</sup>synergy was defined as  $\geq 2 \log_{10}$  bacterial killing for the combination relative to its most active component at the specified time and  $\geq 2 \log_{10}$  below the initial inoculum.
